# Supplementary material
Source: PubMed Central journal article supplement (PMC2790567)
Supplement: mmc1.pdf [file mmc1.pdf]

## Supplemental Data

### Homozygous Inactivating Mutations

#### in the NKX3-2 Gene Result

#### in Spondylo-Megaepiphyseal-Metaphyseal Dysplasia

Jan Hellemans, Marleen Simon, Annelies Dheedene, Yasemin Alanay, Ercan Mihci, Laila Rifai, Abdelaziz Sefiani, Yolande van Bever, Morteza Meradji, Andrea Superti-Furga, and Geert Mortier

Table S1. Details on samples used for *NKX3-2* expression profiling

| <i>sample name</i> | <i>sample origin</i>                              |
|--------------------|---------------------------------------------------|
| small intestine    | Clontech 636539 Human Small Intestine Total RNA   |
| chondrocyte        | own cultures Articular cartilage                  |
| colon              | Stratagene 540009 Colon, Human, Total RNA         |
| trachea            | Clontech 636541 Human Trachea Total RNA           |
| osteosarcoma       | own cultures MG-63 cell line                      |
| brain              | Stratagene 540005 Brain, Human, Total RNA         |
| fibroblasts        | own cultures                                      |
| bone marrow        | BD Bioscience 636-548 Human bone marrow total RNA |
| lung               | Stratagene 540019 Lung, Human, Total RNA          |
| breast             | Stratagene 540045 Breast, Human, Total RNA        |
| kidney             | Stratagene 540013 Kidney, Human, Total RNA        |
| adrenal gland      | Stratagene 540133 Adrenal Gland, Human, Total RNA |
| heart              | Stratagene 540011 Heart, Human, Total RNA         |
| liver              | Stratagene 540017 Liver, Human, Total RNA         |
